# Supplementary material for: Sensitivity of the Elecsys Nucleocapsid Assay for the Detection of Preceding SARS-CoV-2 Infections
Source: PubMed Central journal article supplement — Open Forum Infect Dis. 2022 Jul 26;9(8):ofac349. doi: 10.1093/ofid/ofac349 (PMC9350617; doi:10.1093/ofid/ofac349), 2022-07-26
Supplement: ofac352_supplementary_data.pdf [file ofac352_supplementary_data.pdf]

## **SUPPLEMENTAL MATERIALS**

### **Elecsys Nucleocapsid Antibody Testing Procedures**

The Elecsys assay was performed at the Canadian Blood Services national COVID-19 research laboratory. The Elecsys Anti-SARS-CoV-2 nucleocapsid (Roche, IND, USA) assay, is an immunoassay for the in-vitro qualitative detection of SARS-CoV-2 nucleocapsid antibodies (including IgG). The assay was performed as per manufacturer's instructions, with lot-to-lot standardization and assay calibration as per Roche standard operating procedures and manufacturer's instructions. Heat inactivation was not performed as was not part of the manufacturer's standard protocol. For quality control, PreciControl Anti-SARS-CoV-2 was used as per manufacturer's instructions. These were run at least daily prior-any testing (e.g., every 24 hours when test is in use). Cut-offs were determined automatically by the analyzer software based on calibrated master curves. For calibration, the method is standardized against an internal Roche standard for anti-SARS-CoV-2 provided with the assay. A pre-defined master curve is adapted to the analyzer using the kit calibration reagents. Calibration is performed as per manufacturer's instructions.
